# Supplementary material for: Spontaneous Conception during In Vitro Fertilization prior to Embryo Transfer without the Opportunity for Preimplantation Genetic Testing
Source: Hindawi journal article supplement (doi:10.1155/2019/1804948), 2019-08-06
Supplement: f1 [file 1804948.f1.pdf]

## Supplementary Materials:

Figure 1: Summary of case presentation

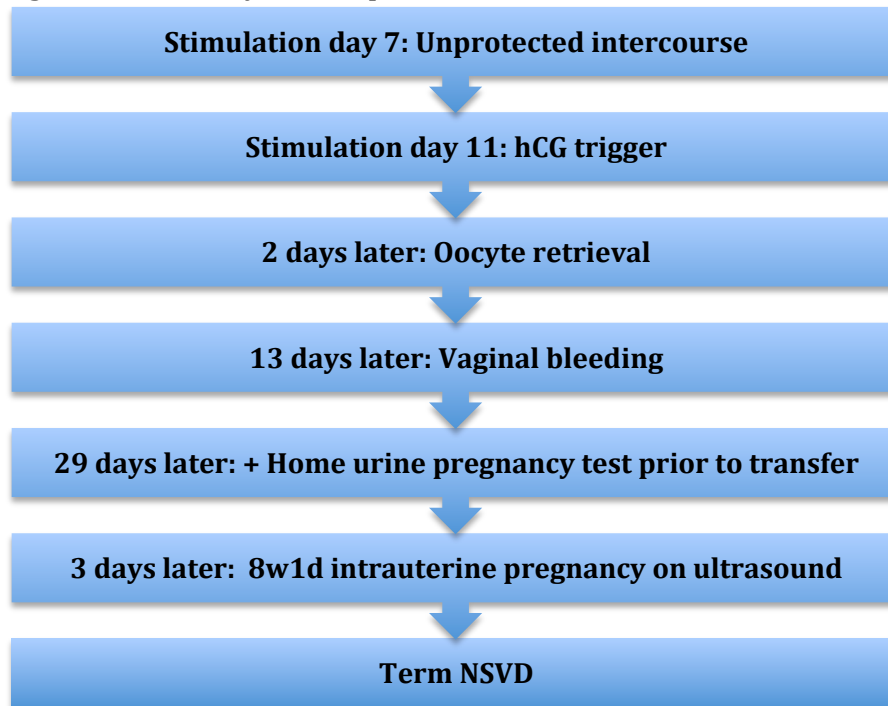

Table 1: Literature review of dizygotic twinning after single embryo transfer

| Publication                                 | Year | Lead Author                 | Study Type           | Finding                                                                                                 |
|---------------------------------------------|------|-----------------------------|----------------------|---------------------------------------------------------------------------------------------------------|
| Fertility & Sterility                       | 2018 | Vega <sup>9</sup>           | Retrospective cohort | 23 out of 255 twins after sET <sup>a</sup> were dizygotic based on sex discordance                      |
| Human Reproduction                          | 2014 | Osianlis <sup>10</sup>      | Retrospective cohort | 12 out of 109 twins after sET were dizygotic based on sex discordance                                   |
| Journal of Assisted Reproduction & Genetics | 2014 | Takehara <sup>11</sup>      | Case report          | Dizygotic twins after sET based on sex discordance                                                      |
| Fertility & Sterility                       | 2011 | van der Hoorn <sup>12</sup> | Case report          | Dizygotic twins after sET confirmed by different HLA typing                                             |
| Human Reproduction                          | 2010 | Sugawara <sup>13</sup>      | Case series (n=2)    | Dizygotic twins after sET based on sex discordance                                                      |
| Journal of Assisted Reproduction & Genetics | 2009 | Kyono <sup>14</sup>         | Case report          | Dizygotic twins after sET based on sex discordance                                                      |
| Human Reproduction                          | 2003 | Cahill <sup>15</sup>        | Case report          | Quadriamniotic/quadrchorionic IUP <sup>b</sup> after transfer of 2 embryos confirmed by genetic testing |
| Reproductive Medicine & Biology             | 2001 | Milki <sup>5</sup>          | Case report          | Quadriamniotic/quadrchorionic IUP after transfer of 2 embryos confirmed by genetic testing              |

<sup>a</sup> Single embryo transfer

<sup>b</sup> Intrauterine pregnancy
